# Supplementary material for: High prevalence of hepatitis delta virus in Cameroon
Source: PubMed Central journal article supplement (PMC6072717; doi:10.1038/s41598-018-30078-5), 2018-08-02
Supplement: 41598_2018_30078_MOESM1_ESM.pdf [file 41598_2018_30078_MOESM1_ESM.pdf]

# Supplementary Information for:

## High prevalence of hepatitis delta virus in Cameroon

Emily K Butler<sup>1+</sup>, Mary A Rodgers<sup>1+\*</sup>, Kelly E Coller<sup>1</sup>, Devin Barnaby<sup>2</sup>, Elizabeth Krilich<sup>2</sup>, Ana Olivo<sup>1</sup>, Michael Cassidy<sup>1</sup>, Dora Mbanya<sup>3</sup>, Lazare Kaptue<sup>4</sup>, Nicaise Ndembi<sup>5</sup>, Gavin Cloherty<sup>1</sup>

+ These authors contributed equally

### Affiliations:

1 Abbott Laboratories, Abbott Park, IL, USA

2 Franciscan Institute for Science and Health, Franciscan University of Steubenville, Steubenville, OH, USA

3 Université de Yaoundé I, Yaoundé, Cameroon

4 Université des Montagnes, Bangangté, Cameroon

5 Institute of Human Virology, Abuja, Nigeria

Corresponding Author: Mary A Rodgers, 100 Abbott Park Rd, Abbott Park, IL 60064, [mary.rodgers@abbott.com](mailto:mary.rodgers@abbott.com), Phone: 224-668-8936, Fax: 224-667-1401

# Figure S1

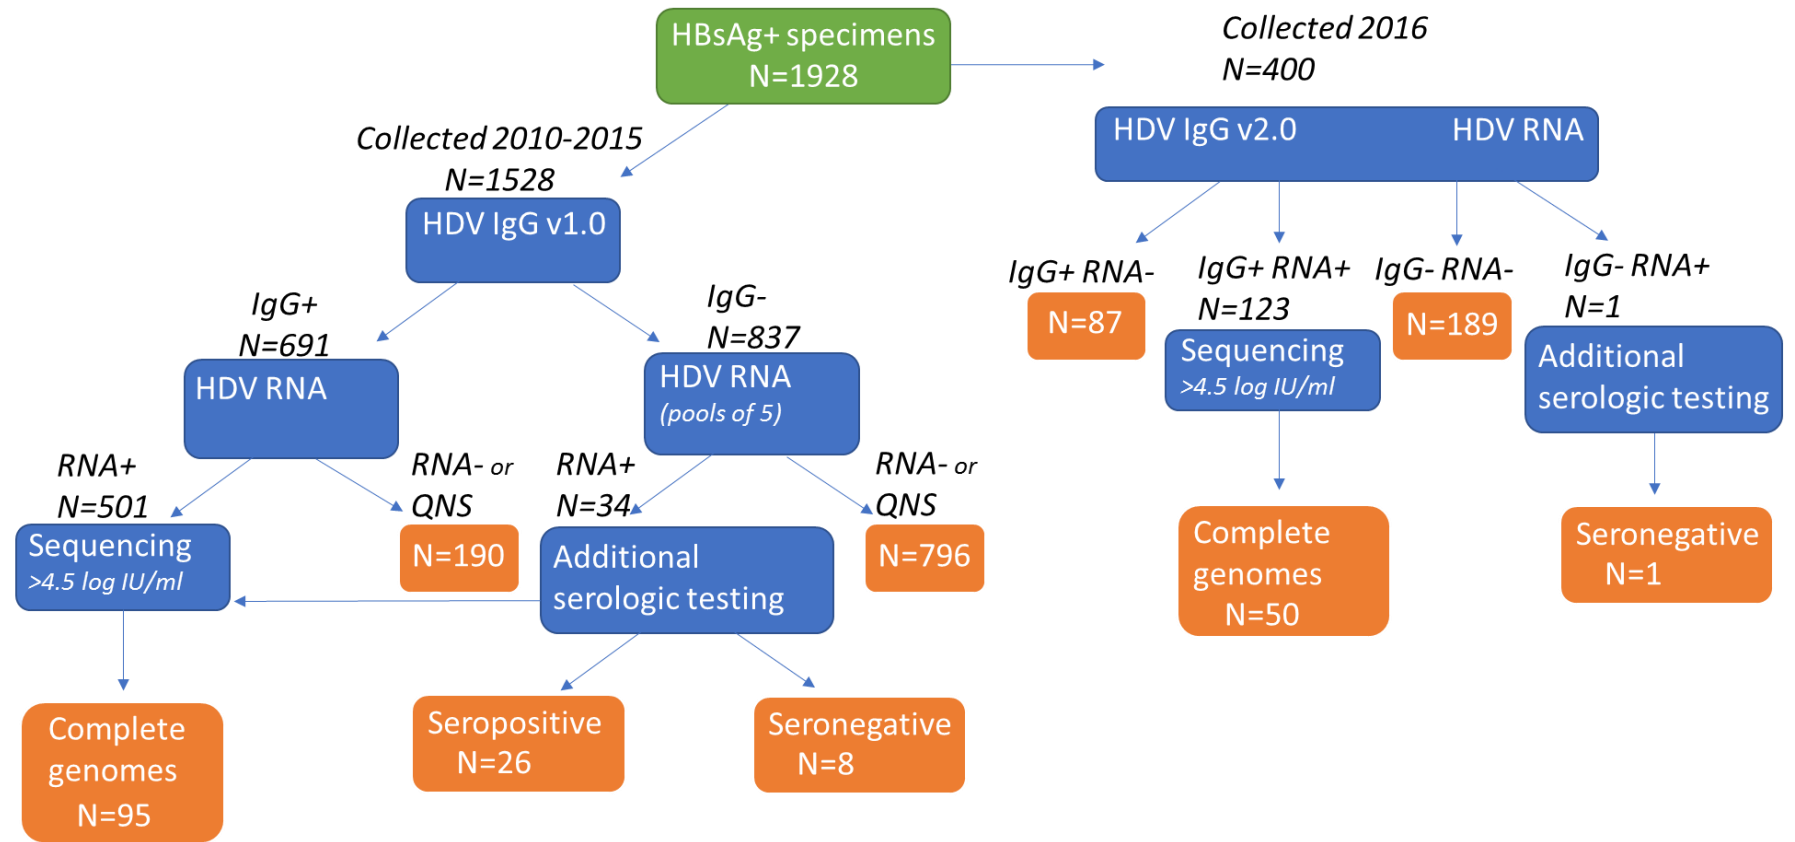

**Figure S1.** Testing workflow: Testing algorithms for specimens collected in 2010-2015 (left) and 2016 (right) are shown. For the 2010-2015 cohort, a total of 34 HDV RNA positive seronegative samples were identified. With additional serologic testing, 26 of these 34 were determined to be HDV seropositive: 3 samples were positive for HDV IgM only and 23 samples had IgG antibodies detectable using recombinant HDAg. Eight of the 34 seronegative samples were HDV RNA positive with no evidence of HDV antibodies (IgM or IgG) in the 2010-2015 cohort. Given the improvements in serodetection by testing with the recombinant HDAg, a revised assay incorporating both HDAg peptides and recombinant protein (version 2.0) was used to screen and additional set of HBsAg samples collected in 2016, with parallel testing for HDV RNA. One RNA+ seronegative specimen was identified in the 2016 cohort with viral load of 1.14 log IU/ml, additional serologic testing determined there was no evidence of HDV antibodies (IgM or IgG) in this specimen. *Quantity not sufficient (QNS)*

# Table S1

| Sample                                     | Year        | Donor risk group   | Site           | HIV status | HDV RNA            |        | HDV IgG S/CO | HDV supplemental         |                                |
|--------------------------------------------|-------------|--------------------|----------------|------------|--------------------|--------|--------------|--------------------------|--------------------------------|
|                                            |             |                    |                |            | HDV VL (log IU/ml) | HDV GT |              | HDV IgM S/N <sup>a</sup> | HDV IgG (rAg) S/N <sup>a</sup> |
| <b>Evidence of HDV IgM antibodies only</b> |             |                    |                |            |                    |        |              |                          |                                |
| 1                                          | 2013        | Unknown illness    | Kribi          | NEG        | 0.44               | VLNS   | 0.02         | 34.45                    | 1.33                           |
| 2                                          | 2011        | VTC                | Kribi          | NEG        | 1.63               | VLNS   | 0.08         | 12.08                    | QNS                            |
| 3                                          | 2013        | Unknown illness    | Ngovagang      | POS        | 8.05               | 1      | 0.17         | 39.01                    | QNS                            |
| <b>Evidence of HDV IgG</b>                 |             |                    |                |            |                    |        |              |                          |                                |
| 4                                          | 2013        | Blood donor        | Yaounde        | QNS        | 1.82               | VLNS   | 0.28         | 100.47                   | 77.26                          |
| 5                                          | 2013        | Unknown illness    | Djoum          | NEG        | 4.69               | 1      | 0.98         | 31.89                    | 81.64                          |
| 6                                          | 2013        | Unknown illness    | Sangmelima     | POS        | 5.27               | 1      | 0.48         | 8.01                     | 87.18                          |
| 7                                          | 2014        | Unknown illness    | Bipindi        | POS        | 4.04               | 1      | 0.86         | 3.32                     | 86.57                          |
| 8                                          | 2013        | Unknown illness    | Ebolowa        | NEG        | 6.78               | 6      | 0.92         | 1.30                     | 77.61                          |
| 9                                          | 2010        | Chest clinic       | Yaounde        | POS        | 3.82               | VLNS   | 0.78         | 1.02                     | 84.23                          |
| 10                                         | 2015        | Antenatal clinic   | Ebolowa        | POS        | 1.94               | VLNS   | 0.72         | 1.79                     | 10.47                          |
| 11                                         | 2014        | Unknown illness    | Kribi          | NEG        | 5.26               | 1      | 0.52         | 3.16                     | 37.97                          |
| 12                                         | 2015        | Antenatal clinic   | Ebolowa        | POS        | 4.12               | QNS    | 0.41         | 0.89                     | 49.20                          |
| 13                                         | 2014        | Unknown illness    | Lolodorf       | NEG        | 6.07               | 1      | 0.19         | 1.86                     | 8.60                           |
| 14                                         | 2011        | VTC                | Sangmelima     | NEG        | 7.31               | 7      | 0.52         | 4.79                     | 30.60                          |
| 15                                         | 2013        | Unknown illness    | Ebolowa        | POS        | 8.41               | 1      | 0.66         | 0.51                     | 39.70                          |
| 16                                         | 2015        | VTC                | Sangmelima     | NEG        | 5.82               | 1      | 0.57         | 1.02                     | 44.00                          |
| 17                                         | 2015        | Blood donor        | Yaounde        | NEG        | 0.58               | VLNS   | 0.06         | 0.83                     | 9.27                           |
| 18                                         | 2014        | Unknown illness    | Kribi          | POS        | 0.66               | VLNS   | 0.29         | 1.14                     | 92.10                          |
| 19                                         | 2015        | Chest clinic       | Yaounde        | POS        | 2.64               | VLNS   | 0.42         | 3.37                     | 83.77                          |
| 20                                         | 2012        | Unknown illness    | Ngovagang      | NEG        | 3.18               | 7      | 0.12         | 3.25                     | 91.98                          |
| 21                                         | 2011        | Antenatal clinic   | Ebolowa        | NEG        | 2.94               | VLNS   | 0.74         | 2.39                     | 100.59                         |
| 22                                         | 2013        | Chest clinic       | Yaounde        | QNS        | 5.33               | 1      | 0.10         | 0.54                     | 50.81                          |
| 23                                         | 2010        | Chest clinic       | Yaounde        | POS        | 5.78               | 1      | 0.08         | 2.10                     | 98.89                          |
| 24                                         | 2011        | VTC                | Kribi          | NEG        | 6.99               | 7      | 0.17         | 0.85                     | 98.89                          |
| 25                                         | 2012        | Hospital patient   | Yaounde        | POS        | 6.75               | 1      | 0.06         | 1.06                     | 6.60                           |
| 26                                         | 2011        | Blood donor        | Yaounde        | POS        | 3.46               | 7      | 0.08         | 6.92                     | 26.80                          |
| <b>No evidence of HDV seroconversion</b>   |             |                    |                |            |                    |        |              |                          |                                |
| 27                                         | 2013        | Unknown illness    | Ebolowa        | NEG        | 0.48               | VLNS   | 0.02         | 3.29                     | 1.58                           |
| 28                                         | 2013        | Unknown illness    | Kribi          | NEG        | 1.55               | VLNS   | 0.01         | 4.98                     | 1.06                           |
| 29                                         | <b>2015</b> | <b>Blood donor</b> | <b>Yaounde</b> | NEG        | 0.75 <sup>b</sup>  | VLNS   | 0.35         | 0.85                     | 5.48                           |
| 30                                         | <b>2015</b> | <b>Blood donor</b> | <b>Yaounde</b> | NEG        | 0.79 <sup>b</sup>  | VLNS   | 0.18         | 0.55                     | 0.61                           |
| 31                                         | <b>2015</b> | <b>Blood donor</b> | <b>Yaounde</b> | NEG        | 0.81 <sup>b</sup>  | VLNS   | 0.02         | 1.42                     | 0.58                           |
| 32                                         | <b>2015</b> | <b>Blood donor</b> | <b>Yaounde</b> | NEG        | 1.23 <sup>b</sup>  | VLNS   | 0.05         | 0.84                     | 0.16                           |
| 33                                         | 2013        | Chest clinic       | Yaounde        | QNS        | 2.25               | VLNS   | 0.10         | 1.42                     | 0.83                           |
| 34                                         | 2014        | Unknown            | unknown        | POS        | 3.75               | 1      | 0.04         | 0.44                     | 0.90                           |

<sup>a</sup> Shown are signal to noise values, S/N>10 considered as evidence of HDV antibodies. Original cut-off in peptide IgG assay was 35\*NC. Values >6 are considered elevated, indicated in italics.

<sup>b</sup> Not determined due to insufficient volume, tested with recombinant HDV Ag in IgM assay.

QNS: quantity not sufficient

VLNS: viral load not sufficient

Four seronegative blood donor specimens with viral load below <1.5 mentioned in the text are indicated in bold

# Figure S2

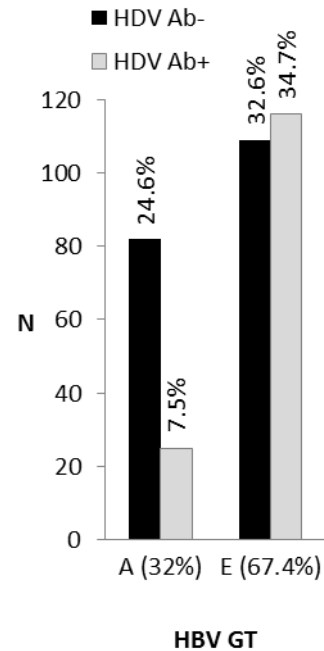

Figure S1. HBV genotype data. HBV genotype data was available for 334 samples in the study cohort; 2 HBV GT AE samples were HDV negative. Results for HBV GT A and E are given above by HDV seroprevalence.
